# Supplementary material for: Association between Gross Motor Competence and Physical Fitness in Chilean Children Aged 4 to 6 Years
Source: MDPI journal article supplement (doi:10.3390/children11050561), 2024-05-08
Supplement: s1 [file s1]

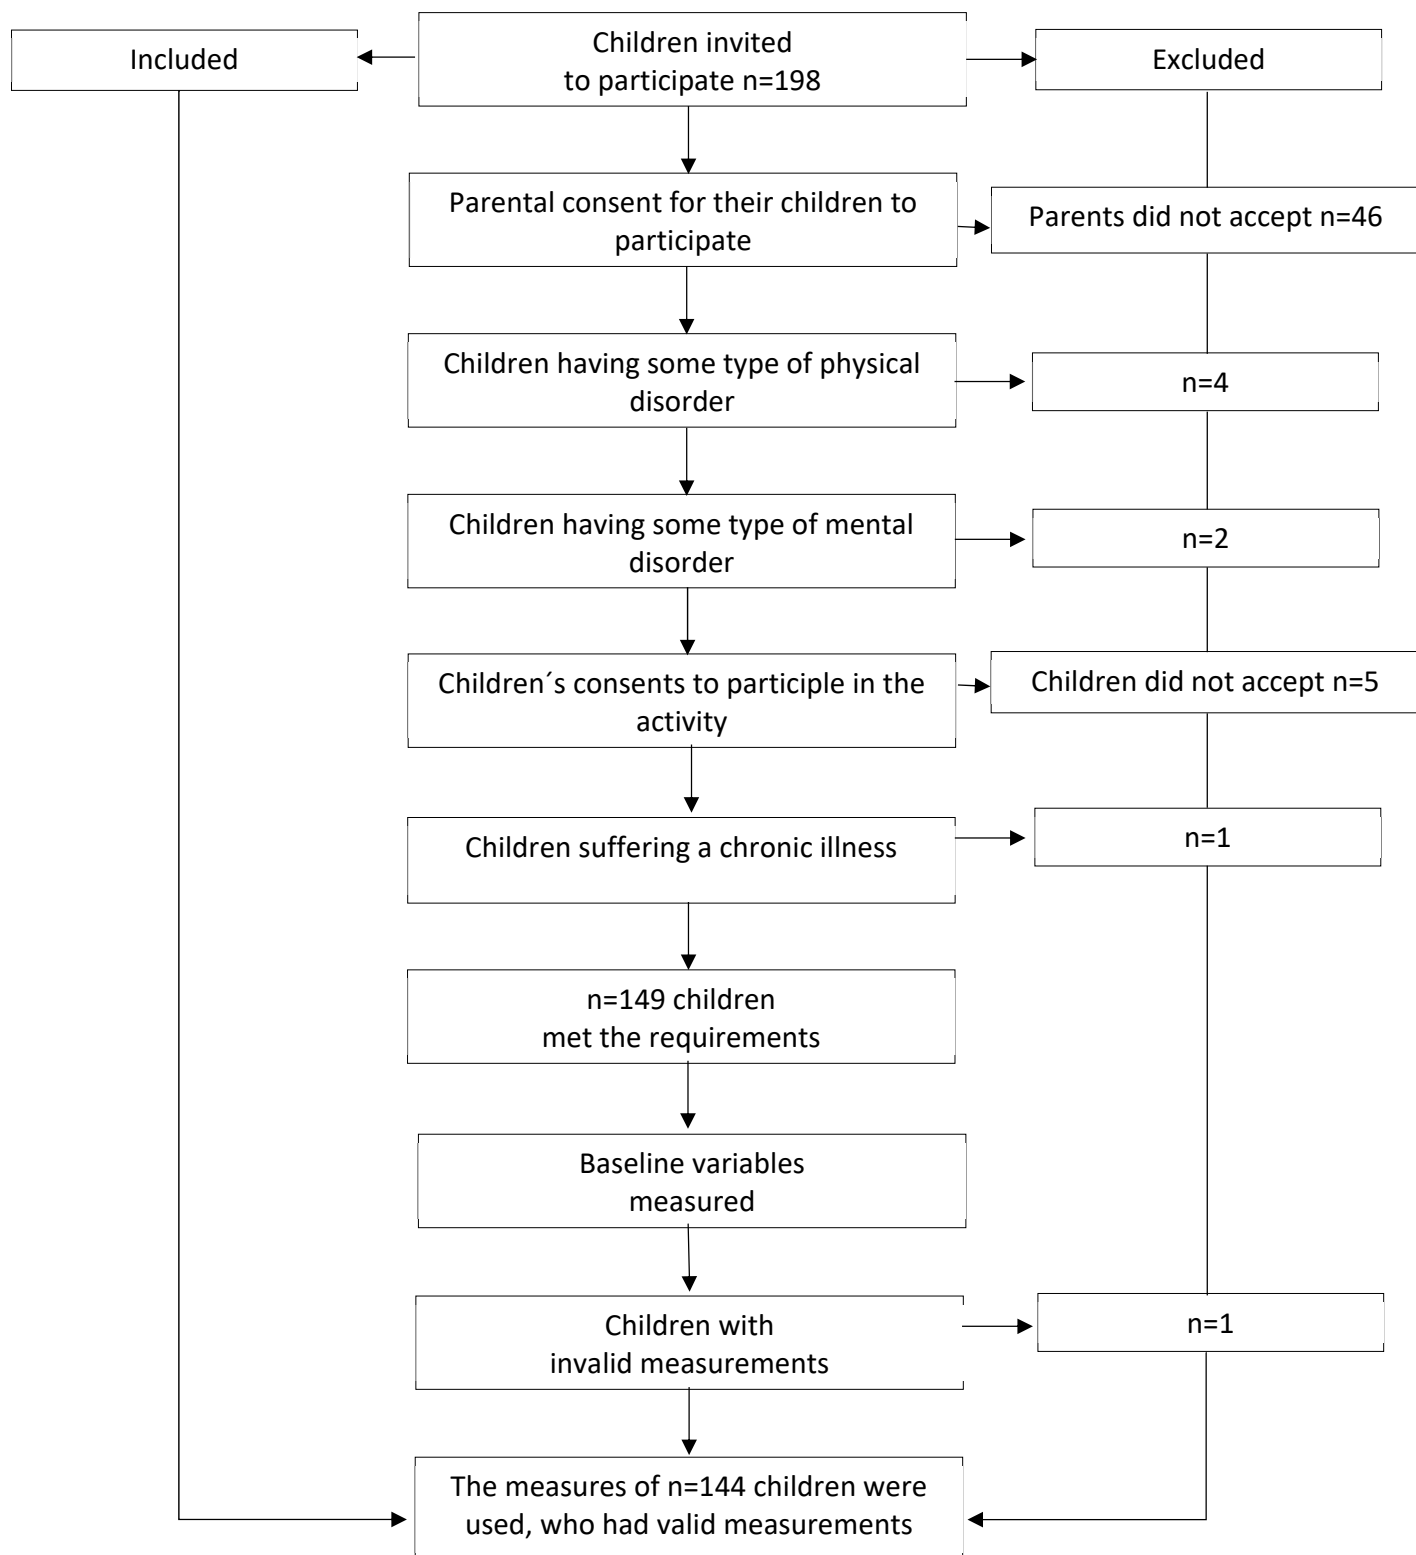

**Figure S1.** Flow diagram of participant recruitment and exclusion with reason

| Subject     | Gender | Age | Catching | Aiming | Right balance | Left balance | Tip-toes | Floor mat |
|-------------|--------|-----|----------|--------|---------------|--------------|----------|-----------|
| Subject 1   | 0      | 5   | 1        | 1      | 3             | 14           | 0        | 4         |
| Subject 2   | 0      | 5   | 0        | 0      | 0             | 3            | 1        | 5         |
| Subject 3   | 0      | 5   | 5        | 2      | 4             | 6            | 12       | 4         |
| Subject 4   | 0      | 6   | 3        | 5      | 5             | 6            | 15       | 4         |
| Subject 5   | 0      | 6   | 8        | 3      | 3             | 3            | 15       | 4         |
| Subject 6   | 0      | 5   | 3        | 2      | 13            | 23           | 5        | 5         |
| Subject 7   | 0      | 5   | 7        | 4      | 4             | 3            | 10       | 4         |
| Subject 8   | 0      | 4   | 3        | 2      | 5             | 7            | 8        | 5         |
| Subject 9   | 0      | 5   | 5        | 5      | 8             | 17           | 5        | 5         |
| Subject 10  | 0      | 4   | 1        | 1      | 5             | 3            | 15       | 4         |
| Subject 11  | 0      | 4   | 5        | 4      | 3             | 6            | 0        | 5         |
| Subject 12  | 0      | 5   | 4        | 2      | 8             | 8            | 15       | 5         |
| Subject 13  | 0      | 5   | 5        | 1      | 5             | 11           | 15       | 5         |
| Subject 14  | 0      | 4   | 4        | 3      | 3             | 2            | 13       | 5         |
| Subject 15  | 0      | 6   | 10       | 4      | 4             | 3            | 15       | 5         |
| Subject 16  | 0      | 6   | 7        | 3      | 15            | 10           | 15       | 5         |
| Subject 17  | 0      | 6   | 7        | 2      | 15            | 14           | 15       | 5         |
| Subject 18  | 0      | 5   | 6        | 2      | 14            | 8            | 15       | 5         |
| Subject 19  | 0      | 6   | 7        | 2      | 21            | 15           | 13       | 5         |
| Subject 20  | 0      | 5   | 9        | 1      | 6             | 3            | 15       | 5         |
| Subject 21  | 0      | 6   | 7        | 5      | 13            | 5            | 15       | 5         |
| Subject 22  | 0      | 6   | 8        | 4      | 15            | 10           | 15       | 5         |
| Subject 23  | 0      | 4   | 6        | 5      | 3             | 2            | 15       | 4         |
| Subject 24  | 0      | 6   | 5        | 4      | 13            | 26           | 15       | 5         |
| Subject 25  | 0      | 5   | 10       | 2      | 7             | 6            | 15       | 5         |
| Subject 26  | 0      | 5   | 9        | 1      | 10            | 8            | 15       | 5         |
| Subject 27  | 0      | 6   | 10       | 3      | 19            | 9            | 15       | 5         |
| Subject 28  | 0      | 5   | 10       | 3      | 8             | 9            | 15       | 5         |
| Subject 29  | 0      | 5   | 5        | 8      | 16            | 9            | 15       | 5         |
| Subject 30  | 0      | 5   | 9        | 5      | 14            | 13           | 15       | 5         |
| Subject 31  | 0      | 5   | 5        | 6      | 17            | 15           | 15       | 5         |
| Subject 32  | 0      | 6   | 10       | 5      | 12            | 17           | 15       | 5         |
| Subject 33  | 0      | 6   | 8        | 6      | 15            | 19           | 15       | 5         |
| Subject 34  | 0      | 5   | 9        | 2      | 11            | 30           | 15       | 4         |
| Subject 35  | 0      | 5   | 9        | 6      | 10            | 15           | 11       | 5         |
| Subject 36  | 0      | 6   | 8        | 6      | 21            | 15           | 15       | 5         |
| Subject 37  | 0      | 6   | 8        | 6      | 20            | 17           | 15       | 5         |
| Subject 38  | 0      | 4   | 5        | 1      | 30            | 6            | 15       | 5         |
| Subject 39  | 0      | 4   | 6        | 5      | 13            | 17           | 15       | 3         |
| Subject 40  | 0      | 4   | 5        | 4      | 21            | 6            | 15       | 5         |
| Subject 41  | 0      | 4   | 6        | 1      | 19            | 11           | 15       | 5         |
| Subject 42  | 0      | 6   | 7        | 5      | 30            | 30           | 15       | 4         |
| Subject 43  | 0      | 6   | 10       | 7      | 12            | 19           | 15       | 5         |
| Subject 44  | 0      | 6   | 8        | 3      | 30            | 30           | 15       | 5         |
| Subject 45  | 0      | 4   | 9        | 5      | 4             | 3            | 15       | 5         |
| Subject 46  | 0      | 4   | 7        | 3      | 20            | 3            | 15       | 5         |
| Subject 47  | 0      | 4   | 7        | 2      | 3             | 22           | 15       | 5         |
| Subject 48  | 0      | 5   | 10       | 6      | 10            | 8            | 15       | 5         |
| Subject 49  | 0      | 5   | 5        | 8      | 10            | 30           | 15       | 5         |
| Subject 50  | 0      | 6   | 10       | 5      | 30            | 10           | 15       | 5         |
| Subject 51  | 0      | 6   | 9        | 2      | 30            | 30           | 15       | 5         |
| Subject 52  | 0      | 6   | 6        | 5      | 30            | 30           | 15       | 5         |
| Subject 53  | 0      | 6   | 8        | 4      | 30            | 30           | 15       | 5         |
| Subject 54  | 0      | 5   | 10       | 2      | 15            | 30           | 15       | 5         |
| Subject 55  | 0      | 6   | 6        | 9      | 19            | 30           | 15       | 5         |
| Subject 56  | 0      | 6   | 10       | 3      | 30            | 30           | 15       | 5         |
| Subject 57  | 0      | 6   | 5        | 7      | 30            | 30           | 15       | 5         |
| Subject 58  | 0      | 6   | 10       | 4      | 26            | 30           | 15       | 5         |
| Subject 59  | 0      | 6   | 9        | 4      | 30            | 30           | 15       | 5         |
| Subject 60  | 0      | 6   | 8        | 5      | 30            | 30           | 15       | 5         |
| Subject 61  | 0      | 4   | 8        | 2      | 30            | 7            | 15       | 5         |
| Subject 62  | 0      | 5   | 10       | 3      | 14            | 30           | 15       | 5         |
| Subject 63  | 0      | 5   | 10       | 3      | 15            | 30           | 15       | 5         |
| Subject 64  | 0      | 6   | 10       | 4      | 30            | 30           | 15       | 5         |
| Subject 65  | 0      | 6   | 10       | 4      | 30            | 30           | 15       | 5         |
| Subject 66  | 0      | 6   | 10       | 4      | 30            | 30           | 15       | 5         |
| Subject 67  | 0      | 6   | 10       | 4      | 30            | 30           | 15       | 5         |
| Subject 68  | 0      | 6   | 10       | 5      | 30            | 25           | 15       | 5         |
| Subject 69  | 0      | 6   | 9        | 5      | 30            | 30           | 15       | 5         |
| Subject 70  | 0      | 5   | 8        | 3      | 30            | 30           | 15       | 5         |
| Subject 71  | 0      | 6   | 10       | 5      | 30            | 30           | 15       | 5         |
| Subject 72  | 0      | 6   | 10       | 5      | 30            | 30           | 15       | 5         |
| Subject 73  | 0      | 5   | 9        | 5      | 22            | 27           | 15       | 5         |
| Subject 74  | 0      | 6   | 10       | 6      | 30            | 30           | 15       | 5         |
| Subject 75  | 0      | 5   | 8        | 5      | 30            | 30           | 15       | 5         |
| Subject 76  | 0      | 6   | 10       | 8      | 30            | 22           | 15       | 5         |
| Subject 77  | 0      | 4   | 7        | 3      | 24            | 21           | 15       | 5         |
| Subject 78  | 0      | 4   | 8        | 4      | 19            | 20           | 15       | 5         |
| Subject 79  | 0      | 6   | 10       | 9      | 30            | 30           | 15       | 5         |
| Subject 80  | 0      | 5   | 9        | 7      | 30            | 30           | 15       | 5         |
| Subject 81  | 0      | 4   | 9        | 4      | 30            | 30           | 15       | 5         |
| Subject 82  | 1      | 4   | 1        | 1      | 1             | 1            | 0        | 3         |
| Subject 83  | 1      | 6   | 9        | 3      | 6             | 2            | 0        | 3         |
| Subject 84  | 1      | 5   | 5        | 3      | 12            | 6            | 4        | 3         |
| Subject 85  | 1      | 6   | 0        | 4      | 2             | 5            | 15       | 4         |
| Subject 86  | 1      | 6   | 8        | 2      | 6             | 3            | 6        | 5         |
| Subject 87  | 1      | 6   | 9        | 0      | 14            | 4            | 4        | 5         |
| Subject 88  | 1      | 6   | 8        | 4      | 6             | 13           | 5        | 5         |
| Subject 89  | 1      | 5   | 7        | 4      | 4             | 3            | 10       | 4         |
| Subject 90  | 1      | 6   | 9        | 2      | 8             | 16           | 15       | 3         |
| Subject 91  | 1      | 6   | 10       | 2      | 2             | 5            | 15       | 5         |
| Subject 92  | 1      | 4   | 5        | 4      | 16            | 7            | 6        | 3         |
| Subject 93  | 1      | 6   | 7        | 6      | 3             | 9            | 15       | 4         |
| Subject 94  | 1      | 6   | 8        | 4      | 19            | 20           | 2        | 5         |
| Subject 95  | 1      | 5   | 10       | 5      | 6             | 5            | 0        | 5         |
| Subject 96  | 1      | 6   | 6        | 6      | 9             | 20           | 15       | 3         |
| Subject 97  | 1      | 6   | 10       | 1      | 20            | 5            | 14       | 4         |
| Subject 98  | 1      | 6   | 6        | 5      | 5             | 9            | 15       | 5         |
| Subject 99  | 1      | 5   | 7        | 6      | 16            | 7            | 6        | 5         |
| Subject 100 | 1      | 4   | 7        | 7      | 5             | 2            | 12       | 3         |
| Subject 101 | 1      | 4   | 4        | 1      | 7             | 10           | 15       | 4         |
| Subject 102 | 1      | 5   | 4        | 7      | 10            | 9            | 15       | 5         |
| Subject 103 | 1      | 6   | 9        | 4      | 13            | 9            | 15       | 5         |
| Subject 104 | 1      | 6   | 10       | 4      | 8             | 13           | 15       | 5         |
| Subject 105 | 1      | 5   | 9        | 3      | 9             | 8            | 15       | 5         |
| Subject 106 | 1      | 5   | 3        | 8      | 8             | 19           | 15       | 5         |
| Subject 107 | 1      | 6   | 7        | 3      | 22            | 30           | 15       | 4         |
| Subject 108 | 1      | 4   | 8        | 4      | 10            | 15           | 10       | 3         |
| Subject 109 | 1      | 4   | 8        | 3      | 5             | 9            | 8        | 5         |
| Subject 110 | 1      | 5   | 10       | 4      | 6             | 14           | 10       | 5         |
| Subject 111 | 1      | 6   | 10       | 6      | 21            | 11           | 15       | 3         |
| Subject 112 | 1      | 6   | 10       | 6      | 14            | 18           | 10       | 5         |
| Subject 113 | 1      | 6   | 10       | 5      | 12            | 12           | 15       | 5         |
| Subject 114 | 1      | 4   | 10       | 2      | 3             | 4            | 13       | 5         |
| Subject 115 | 1      | 6   | 10       | 7      | 3             | 15           | 15       | 5         |
| Subject 116 | 1      | 6   | 10       | 5      | 9             | 20           | 15       | 5         |
| Subject 117 | 1      | 5   | 10       | 7      | 2             | 2            | 15       | 5         |
| Subject 118 | 1      | 6   | 9        | 6      | 4             | 30           | 15       | 5         |
| Subject 119 | 1      | 6   | 6        | 8      | 23            | 30           | 15       | 3         |
| Subject 120 | 1      | 6   | 9        | 3      | 30            | 30           | 15       | 4         |
| Subject 121 | 1      | 6   | 10       | 4      | 15            | 30           | 15       | 5         |
| Subject 122 | 1      | 4   | 9        | 7      | 8             | 6            | 15       | 3         |
| Subject 123 | 1      | 5   | 10       | 5      | 13            | 30           | 8        | 5         |
| Subject 124 | 1      | 5   | 10       | 4      | 5             | 20           | 15       | 5         |
| Subject 125 | 1      | 6   | 9        | 5      | 30            | 8            | 15       | 5         |
| Subject 126 | 1      | 6   | 9        | 2      | 30            | 26           | 15       | 5         |
| Subject 127 | 1      | 6   | 10       | 3      | 20            | 30           | 15       | 5         |
| Subject 128 | 1      | 5   | 9        | 4      | 25            | 5            | 15       | 5         |
| Subject 129 | 1      | 5   | 10       | 4      | 18            | 11           | 15       | 5         |
| Subject 130 | 1      | 6   | 10       | 4      | 30            | 19           | 15       | 5         |
| Subject 131 | 1      | 6   | 10       | 6      | 16            | 25           | 15       | 5         |
| Subject 132 | 1      | 4   | 8        | 3      | 16            | 16           | 15       | 4         |
| Subject 133 | 1      | 6   | 9        | 6      | 30            | 30           | 15       | 5         |
| Subject 134 | 1      | 6   | 10       | 4      | 30            | 30           | 15       | 5         |
| Subject 135 | 1      | 6   | 9        | 6      | 30            | 30           | 15       | 5         |
| Subject 136 | 1      | 6   | 9        | 7      | 30            | 30           | 15       | 5         |
| Subject 137 | 1      | 4   | 7        | 3      | 15            | 30           | 15       | 5         |
| Subject 138 | 1      | 5   | 9        | 4      | 30            | 30           | 15       | 5         |
| Subject 139 | 1      | 6   | 10       | 7      | 30            | 28           | 15       | 5         |
| Subject 140 | 1      | 6   | 8        | 9      | 30            | 30           | 15       | 5         |
| Subject 141 | 1      | 5   | 10       | 4      | 30            | 30           | 15       | 5         |
| Subject 142 | 1      | 4   | 9        | 2      | 19            | 27           | 15       | 5         |
| Subject 143 | 1      | 5   | 10       | 6      | 30            | 30           | 15       | 5         |
| Subject 144 | 1      | 5   | 10       | 6      | 30            | 30           | 15       | 5         |

Figure S2. Results obtained in tests to obtain gross motor competence.

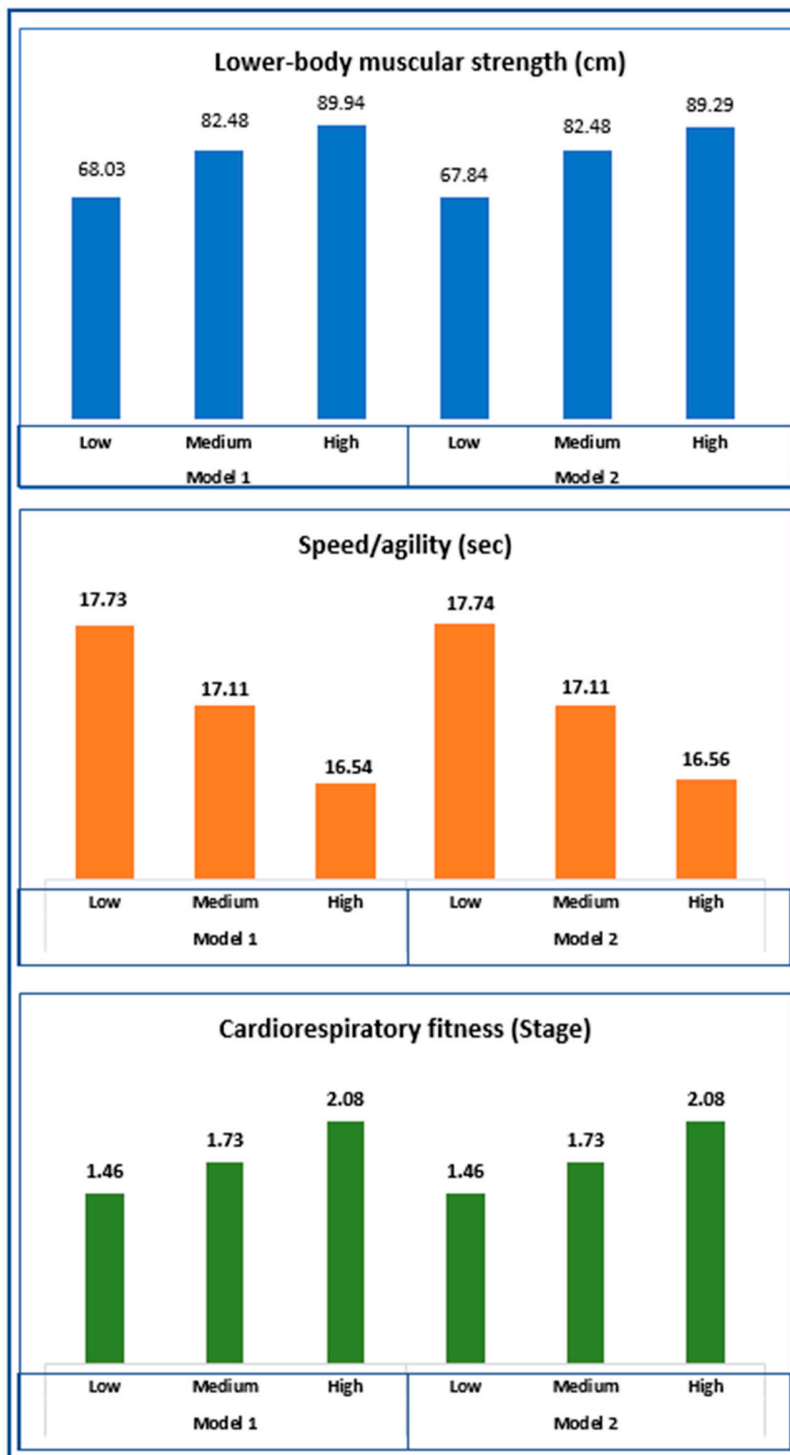

**Figure S3.** Mean differences in physical fitness by gross motor competence categories, controlling for confounders, by gender.
